# Supplementary material for: Porcine Intestinal Mucosal Peptides Target Macrophage-Modulated Inflammation and Alleviate Intestinal Homeostasis in Dextrose Sodium Sulfate-Induced Colitis in Mice
Source: MDPI journal article supplement (doi:10.3390/foods13010162), 2024-01-03
Supplement: s1 [file s1]

Supplementary Table S1. Primers of RT-qPCR.

| Gene          | Forward Primer          | Reverse Primer           |
|---------------|-------------------------|--------------------------|
| IL-1 $\beta$  | TGACGGACCCCAAAAGATGA    | TCTCCACAGCCACAATGAGT     |
| IL-6          | GAGGATACCACTCCCAACAGACC | AAGTGCATCATCGTTGTTCATACA |
| TNF- $\alpha$ | CCCTCACACTCAGATCATCTTCT | CTACGACGTGGGCTACAG       |
| ZO-1          | TCTTCCATCATTTTCGCTGTGT  | TCTGAAACCATCAAGTCCACA    |
| Occludin      | TGCGGTGACTTCTCCAAACT    | GGGAACGTGGCCGATAT        |
| Claudin-1     | TAATTGGCATCCTGCTGGGG    | CTGGCCAAATTCATACCTGGC    |
| GAPDH         | TGGAGAAACCTGCCAAGTATGA  | TGGAAGAATGGGAGTTGCTGT    |
